# Supplementary material for: Allelic Diversity of the Plasmodium falciparum Erythrocyte Membrane Protein 1 Entails Variant-Specific Red Cell Surface Epitopes
Source: PubMed Central journal article supplement (PMC3029348; doi:10.1371/journal.pone.0016544), 2011-01-27
Supplement: pone.0016544.s003.pdf [file pone.0016544.s003.pdf]

|                  | 50% titer      |                |                |       | endpoint titer (95%) |                  |                  |        |
|------------------|----------------|----------------|----------------|-------|----------------------|------------------|------------------|--------|
|                  | VarO           | R29            | PF13           | PFL   | VarO                 | R29              | PF13             | PFL    |
| <b>Anti-VarO</b> | <b>409 600</b> | 4 000          | 10 00          | 1 000 | <b>6 553 600</b>     | 204 800          | 409 600          | 6 400  |
| <b>Anti-R29</b>  | 4 000          | <b>204 800</b> | 5 000          | 2 000 | 102 400              | <b>3 276 800</b> | 40 000           | 12 800 |
| <b>Anti-PF13</b> | 1 000          | 2 000          | <b>204 800</b> | 2 500 | 204 000              | 75 000           | <b>3 276 800</b> | 25 600 |

|                  | 50% titer      |                |                |          | endpoint titer (95%) |                  |                  |           |
|------------------|----------------|----------------|----------------|----------|----------------------|------------------|------------------|-----------|
|                  | VarO           | R29            | PF13           | PFL      | VarO                 | R29              | PF13             | PFL       |
| <b>Anti-VarO</b> | <b>409 600</b> | 100-fold       | 40-fold        | 400-fold | <b>6 553 600</b>     | 30-fold          | 16-fold          | 1000-fold |
| <b>Anti-R29</b>  | 50-fold        | <b>204 800</b> | 40-fold        | 100-fold | 30-fold              | <b>3 276 800</b> | 80-fold          | 250-fold  |
| <b>Anti-PF13</b> | 20-fold        | 100-fold       | <b>204 800</b> | 80-fold  | 16-fold              | 45-fold          | <b>3 276 800</b> | 128-fold  |
